# Supplementary material
Source: Springer Nature journal article supplement (https://www.springermedizin.de/resource/supplementary/12960_2006_73_MOESM1_ESM.pdf/9570408)

**Percentage of responses**

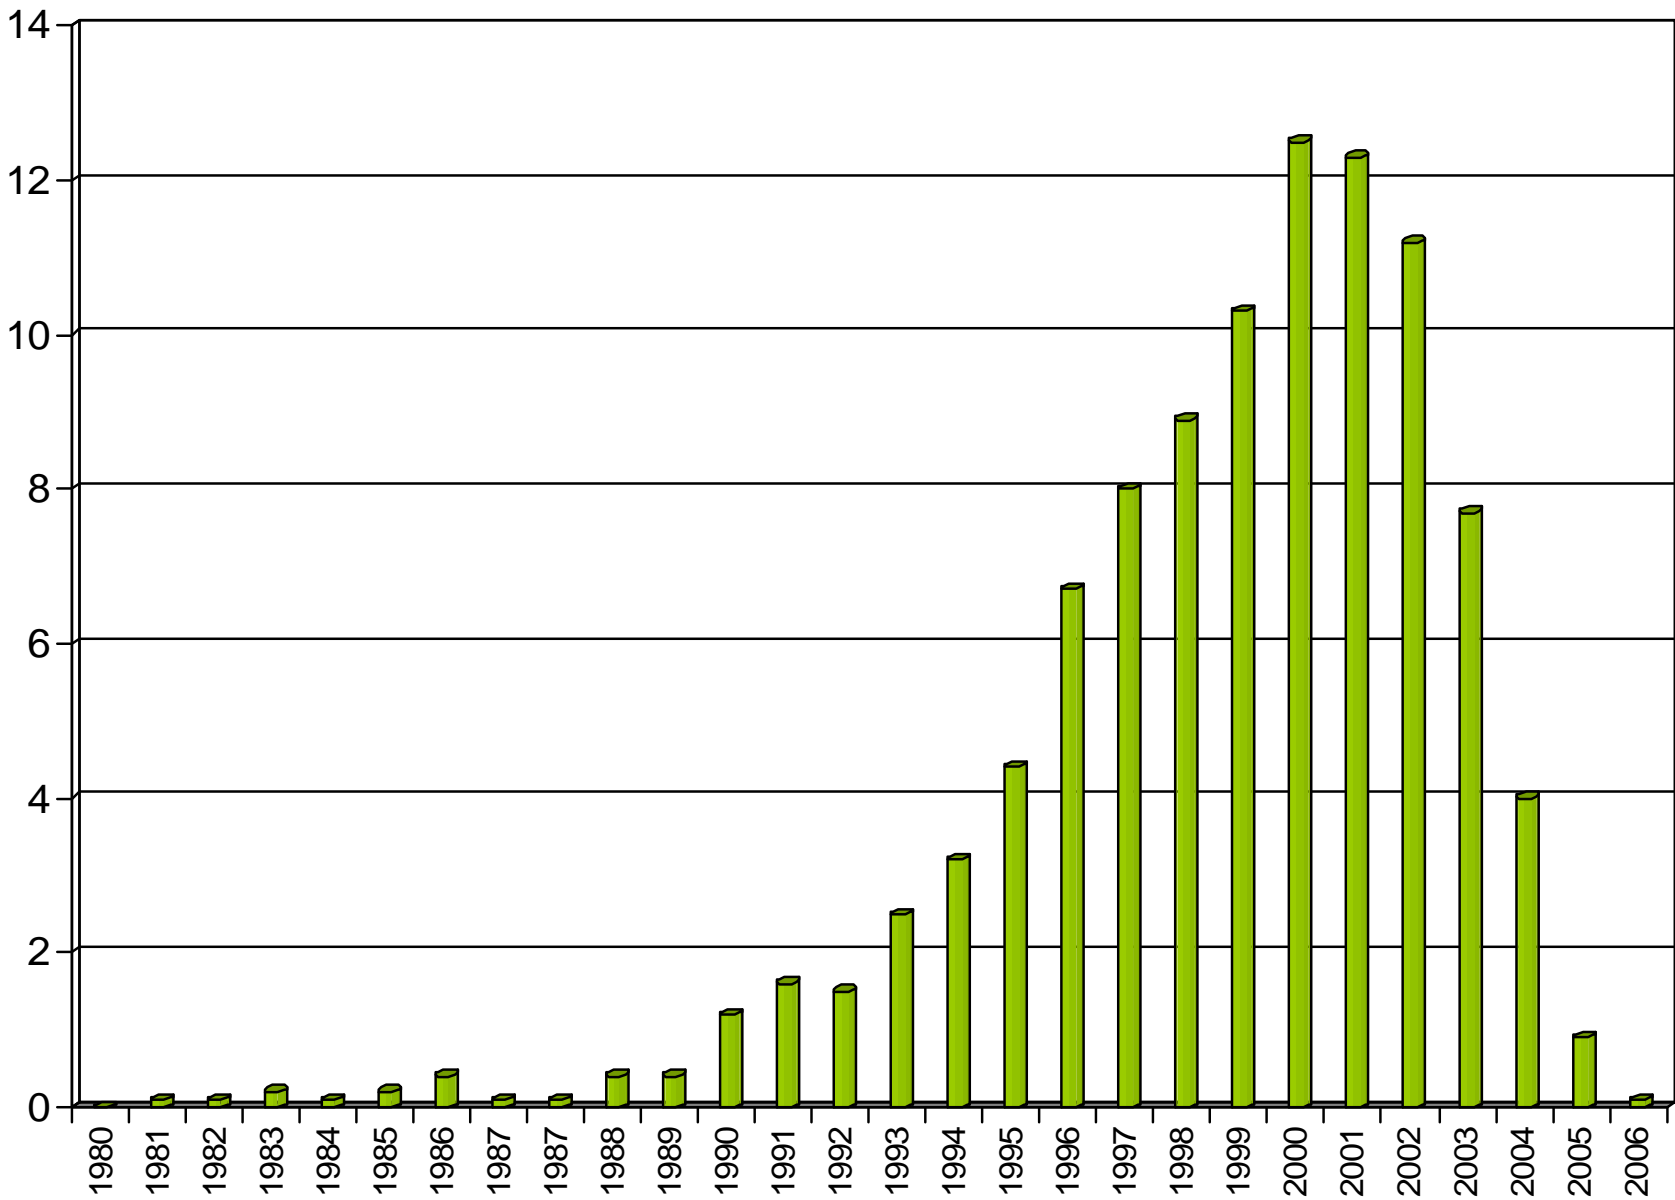

**Year of primary medical qualification**

Supplement: MOESM1 [file 9570408]
